# Supplementary material for: Positive Effect of Air Purifier Intervention on Baroreflex Sensitivity and Biomarkers of Oxidative Stress in Patients with Coronary Artery Disease: A Randomized Crossover Intervention Trial
Source: MDPI journal article supplement (doi:10.3390/ijerph19127078), 2022-06-09
Supplement: s1 [file s1]

**Table S4**

| Outcomes                          | Intervention (Active vs sham) |               |         | Indoor PM <sub>2.5</sub> level (one percent increase) |               |         |
|-----------------------------------|-------------------------------|---------------|---------|-------------------------------------------------------|---------------|---------|
|                                   | Percent, %                    | 95% CI        | P-value | Percent, %                                            | 95% CI        | P-value |
| Heart rate variability            |                               |               |         |                                                       |               |         |
| SDNN                              | 9.76                          | -3.60, 24.97  | 0.232   | -11.20                                                | -28.16, 5.77  | 0.187   |
| RMSDD                             | 6.40                          | -10.73, 26.81 | 0.552   | -6.26                                                 | -26.46, 13.95 | 0.531   |
| HF                                | 20.20                         | -20.97, 82.81 | 0.461   | -11.55                                                | -60.21, 37.10 | 0.630   |
| HFnorm                            | -5.75                         | -23.60, 16.28 | 0.635   | 14.47                                                 | -9.68, 38.63  | 0.230   |
| LF                                | 40.72                         | -4.49, 107.32 | 0.145   | -30.88                                                | -75.41, 13.66 | 0.166   |
| LFnorm                            | 11.40                         | -5.39, 31.18  | 0.270   | -10.76                                                | -29.88, 8.36  | 0.259   |
| LF/HF                             | 18.98                         | -16.15, 68.83 | 0.405   | -23.89                                                | -64.49, 16.70 | 0.238   |
| Deep breathing test               |                               |               |         |                                                       |               |         |
| E:I ratio                         | 0.54                          | -1.12, 2.23   | 0.588   | -0.19                                                 | -3.07, 2.69   | 0.894   |
| HRDB                              | 6.67                          | -8.54, 24.42  | 0.478   | 3.65                                                  | -22.75, 30.04 | 0.777   |
| Tilt table test                   |                               |               |         |                                                       |               |         |
| Max delta SBP (mmHg)              | 12.38                         | -7.55, 32.3   | 0.300   | -7.11                                                 | -30.19, 15.98 | 0.534   |
| delta SBP (mmHg)                  | 7.36                          | -15.79, 30.50 | 0.594   | -0.56                                                 | -28.31, 27.18 | 0.967   |
| delta DBP (mmHg)                  | 3.80                          | -6.19, 13.80  | 0.524   | 0.11                                                  | -11.80, 12.02 | 0.985   |
| delta HR (beat/min)               | 3.61                          | -0.60, 7.81   | 0.157   | -7.02                                                 | -14.01, -0.02 | 0.049   |
| Flow-mediated vasodilation        |                               |               |         |                                                       |               |         |
| Endothelin independent dilatation | 4.31                          | -2.46, 11.56  | 0.295   | -0.85                                                 | -8.77, 7.06   | 0.828   |
| Endothelin dependent dilation     | 2.69                          | -2.95, 8.66   | 0.432   | -2.50                                                 | -9.12, 4.13   | 0.448   |
