# Supplementary material for: Positive Effect of Air Purifier Intervention on Baroreflex Sensitivity and Biomarkers of Oxidative Stress in Patients with Coronary Artery Disease: A Randomized Crossover Intervention Trial
Source: MDPI journal article supplement (doi:10.3390/ijerph19127078), 2022-06-09
Supplement: s1 [file s1]

**Table S2. Changes in heart rate variability, deep breathing test, tilt table test and flow-mediated vasodilation between pre- and post-intervention according to intervention phase.**

|                                   | Sham filtration |               |         | Active filtration |               |         |
|-----------------------------------|-----------------|---------------|---------|-------------------|---------------|---------|
|                                   | Pre             | Post          | P-value | Pre               | Post          | P-value |
| Heart rate variability            |                 |               |         |                   |               |         |
| SDNN (ms)                         | 25.1 (1.6)      | 26.4 (1.6)    | 0.520   | 24.8 (1.8)        | 29.1 (1.6)    | 0.015   |
| RMSDD (ms)                        | 17.5 (1.9)      | 17.4 (1.9)    | 0.928   | 17.7 (2.0)        | 18.4 (1.9)    | 0.654   |
| HF (ms <sup>2</sup> )             | 51.1 (3.4)      | 50.0 (3.6)    | 0.895   | 51.2 (3.7)        | 58.6 (4.4)    | 0.554   |
| HFnorm                            | 37.4 (1.8)      | 38.3 (1.8)    | 0.809   | 36.7 (1.6)        | 35.9 (1.7)    | 0.849   |
| LF (ms <sup>2</sup> )             | 71.3 (3.1)      | 66.7 (3.7)    | 0.740   | 77.3 (4.3)        | 94.0 (3.3)    | 0.328   |
| LFnorm                            | 52.0 (1.6)      | 51.2 (1.6)    | 0.872   | 54.9 (1.6)        | 57.8 (1.3)    | 0.537   |
| LF/HF                             | 1.4 (2.7)       | 1.3 (2.7)     | 0.774   | 1.5 (2.5)         | 1.6 (2.2)     | 0.701   |
| Deep breathing test               |                 |               |         |                   |               |         |
| E:I ratio                         | 1.13 (0.01)     | 1.13 (0.01)   | 0.674   | 1.13 (0.02)       | 1.13 (0.01)   | 0.904   |
| HRDB                              | 7.55 (0.79)     | 7.42 (0.92)   | 0.833   | 7.81 (1.48)       | 7.50 (0.86)   | 0.796   |
| Tilt table test                   |                 |               |         |                   |               |         |
| Max delta <sup>a</sup> SBP (mmHg) | -27.83 (4.13)   | -26.14 (3.89) | 0.662   | -25.44 (3.57)     | -34.73 (9.25) | 0.115   |
| Delta <sup>b</sup> SBP (mmHg)     | -16.94 (5.00)   | -9.65 (7.37)  | 0.375   | -16.86 (3.90)     | -13.8 (5.24)  | 0.528   |
| delta <sup>b</sup> DBP (mmHg)     | -7.58 (2.19)    | -4.26 (2.44)  | 0.313   | -7.62 (1.69)      | -6.18 (1.88)  | 0.395   |
| delta <sup>b</sup> HR (beat/min)  | 8.27 (1.81)     | 6.41 (0.98)   | 0.258   | 4.54 (1.26)       | 5.30 (1.38)   | 0.679   |
| Flow-mediated vasodilation        |                 |               |         |                   |               |         |
| Endothelin independent dilatation | 11.82 (0.74)    | 11.89 (0.72)  | 0.845   | 11.43 (0.72)      | 11.86 (0.65)  | 0.158   |
| Endothelin dependent dilation     | 17.54 (0.91)    | 17.78 (0.93)  | 0.389   | 17.44 (0.99)      | 18.08 (0.92)  | 0.093   |
