# Supplementary material for: Positive Effect of Air Purifier Intervention on Baroreflex Sensitivity and Biomarkers of Oxidative Stress in Patients with Coronary Artery Disease: A Randomized Crossover Intervention Trial
Source: MDPI journal article supplement (doi:10.3390/ijerph19127078), 2022-06-09
Supplement: s1 [file s1]

**Table S3. Differences in health outcomes between pre- and post-intervention according to intervention phase.**

|                                           | Difference* (SE) |                   | P-value |
|-------------------------------------------|------------------|-------------------|---------|
|                                           | Sham filtration  | Active filtration |         |
| Blood pressure                            |                  |                   |         |
| SBP (mmHg)                                | -1.88 (2.17)     | -4.18 (2.61)      | 0.4854  |
| DBP (mmHg)                                | 0.82 (1.44)      | -0.18 (1.48)      | 0.6382  |
| HR (beats/min)                            | 1.06 (1.11)      | 1.36 (1.47)       | 0.8704  |
| Autonomic nerve function                  |                  |                   |         |
| xBRS (ms/mmHg)                            | 0.78 (0.57)      | 1.94 (0.91)       | 0.2924  |
| Inflammation and oxidative stress markers |                  |                   |         |
| CRP (mg/dL)                               | 0.28 (0.33)      | 0.53 (1.14)       | 0.8252  |
| IL-6 (pg/mL)                              | 6.33 (4.94)      | 5.07 (4.71)       | 0.8644  |
| BNP (pg/mL)                               | -0.30 (0.53)     | 0.77 (0.93)       | 0.1756  |
| 8-OHdG (µg/g creatinine)                  | 0.78 (0.40)      | 0.05 (0.64)       | 0.3632  |
| Heart rate variability                    |                  |                   |         |
| SDNN                                      | 1.87 (2.73)      | 3.67 (2.63)       | 0.6495  |
| RMSDD                                     | 0.13 (1.10)      | 0.20 (2.03)       | 0.9787  |
| HF                                        | 12.23 (15.15)    | 114.27 (95.51)    | 0.2515  |
| HFnorm                                    | 3.00 (3.89)      | -0.90 (3.84)      | 0.5428  |
| LF                                        | -28.37 (40.55)   | -56.13 (113.73)   | 0.5809  |
| LFnorm                                    | -3.00 (3.89)     | 0.93 (3.84)       | 0.5391  |
| LF/HF                                     | -0.32 (0.32)     | 0.16 (0.50)       | 0.4657  |
| Deep breathing test                       |                  |                   |         |
| E:I ratio                                 | -0.60 (2.49)     | -0.90 (4.63)      | 0.9552  |
| HRDB                                      | -0.52 (1.38)     | 0.42 (1.46)       | 0.4247  |
| Tilt table test                           |                  |                   |         |
| delta SBP (mmHg)                          | -4.85 (4.74)     | 0.18 (1.92)       | 0.2917  |
| delta DBP (mmHg)                          | -3.09 (2.79)     | -0.85 (1.38)      | 0.4384  |
| delta HR (beat/min)                       | 1.52 (1.26)      | -0.85 (1.66)      | 0.3457  |
| Flow-mediated vasodilation                |                  |                   |         |
| Endothelin independent dilatation         | 0.05 (0.36)      | 0.48 (0.32)       | 0.3595  |
| Endothelin dependent dilation             | 0.23 (0.30)      | 0.70 (0.40)       | 0.3916  |

\*Difference calculated as post-phase minus pre-phase
