# Supplementary material for: Positive Effect of Air Purifier Intervention on Baroreflex Sensitivity and Biomarkers of Oxidative Stress in Patients with Coronary Artery Disease: A Randomized Crossover Intervention Trial
Source: MDPI journal article supplement (doi:10.3390/ijerph19127078), 2022-06-09
Supplement: s1 [file s1]

**Table S1. Baseline characteristics of study participants by intervention sequence.**

| Variable               |                   | Active – sham filtration | Sham - active filtration |
|------------------------|-------------------|--------------------------|--------------------------|
| Number                 |                   | 19                       | 19                       |
| Age                    | yrs               | 65.7±6.6                 | 65.9±6.4                 |
| Sex                    | Male : female     | 6:13                     | 2:17                     |
| Height                 | cm                | 163.9±9.3                | 166.2±6.2                |
| Weight                 | kg                | 71.4±9.4                 | 66.8±7.5                 |
| BMI                    | kg/m <sup>2</sup> | 26.6±3.1                 | 24.2±2.7                 |
| Clinical diagnosis     | STEMI             | 10 (52.6)                | 7 (36.8)                 |
|                        | NSTEMI            | 3 (15.8)                 | 3 (15.8)                 |
|                        | Unstable angina   | 6 (31.6)                 | 9 (47.4)                 |
| No of prior PCI        | 1                 | 16 (84.2)                | 18 (94.7)                |
|                        | 2                 | 3 (15.8)                 | 1 (5.3)                  |
| Underlying disease     | Hypertension      | 5 (26.3)                 | 8 (42.1)                 |
|                        | Diabetes          | 6 (31.6)                 | 7 (36.8)                 |
|                        | Dyslipidemia      | 3 (15.8)                 | 7 (36.8)                 |
|                        | HF                | 1 (5.3)                  | 1 (5.3)                  |
|                        | TIA               | 0 (0)                    | 1 (5.3)                  |
| Antianginal medication | Beta blocker      | 11 (57.9)                | 15 (79)                  |
|                        | ACEI/ARB          | 10 (52.6)                | 10 (52.6)                |
|                        | Nitrate           | 5 (26.3)                 | 2 (10.5)                 |
| Smoking status         | Current smokers   | 5 (26.3)                 | 3 (15.8)                 |
|                        | Secondary smokers | 3 (15.8)                 | 10 (52.6)                |
