# Supplementary material for: Positive Effect of Air Purifier Intervention on Baroreflex Sensitivity and Biomarkers of Oxidative Stress in Patients with Coronary Artery Disease: A Randomized Crossover Intervention Trial
Source: Int J Environ Res Public Health. 2022 Jun 9;19(12):7078. doi: 10.3390/ijerph19127078 (PMC9223013; doi:10.3390/ijerph19127078)
Supplement: Supplementary file 1 [file ijerph-19-07078-s001.zip]

Archive with 6 entries (6 files):
- S1 Figure.pdf
- S1 FILE (Study protocol).pdf
- S1 Table.pdf
- S2 Table.pdf
- S3 Table.pdf
- S4 Table.pdf
